# Supplementary material for: Primary productivity of snow algae communities on stratovolcanoes of the Pacific Northwest
Source: PubMed Central journal article supplement — Geobiology. 2016 Dec 5;15(2):280–95. doi: 10.1111/gbi.12219 (PMC5324535; doi:10.1111/gbi.12219), 2016-12-05
Supplement: GBI-15-280-s001.pdf [file GBI-15-280-s001.pdf]

Table S1. Sample site designation for libraries deposited in the NCBI Sequence Read Archive (SRA) database.

| <b>Library</b> | <b>Collection site</b>        |
|----------------|-------------------------------|
| 620BA          | Palmer Glacier snow           |
| 620BB          | Palmer Glacier sediments      |
| 621EA          | Mt. Adams Snowfield snow      |
| 621EB          | Mt. Adams Snowfield sediments |
| 621GA          | Gotchen Glacier snow          |
| 621GC          | Gotchen Glacier sediments     |
| 622I           | Eliot Glacier snow            |
| 622J           | Eliot Glacier sediments       |
| 625PA          | Collier Glacier snow          |
| 625PB          | Collier Glacier sediments     |
| 625PC          | Collier Glacier sediments     |

Table S2. Photosynthetically active radiation (PAR) values recorded over the time course of each incubation period.

| <b>Photosynthetically Active Radiation (<math>\mu\text{mol m}^{-2} \text{s}^{-1}</math>)</b> |       |            |             |             |         |
|----------------------------------------------------------------------------------------------|-------|------------|-------------|-------------|---------|
|                                                                                              | T = 0 | T = 60 min | T = 120 min | T = 240 min | Average |
| <b>Collier Glacier</b>                                                                       | 1242  | 1696       | 1552        | 1367        | 1464    |
|                                                                                              | T = 0 | T = 60 min | T=120 min   |             | Average |
| <b>Eliot Glacier</b>                                                                         | 1542  | 1332       | 1656        |             | 1510    |
|                                                                                              | T = 0 | T = 60 min | T = 120     | T = 300     | Average |
| <b>Mt. Adams Snowfield</b>                                                                   | 1445  | 1003       | 1350        | 1434        | 1308    |

Table S3. *p*-values for t-tests for each comparison of <sup>13</sup>C uptake rates from the Mt. Adams snowfield microcosms at T = 60 min and T = 300 min. *p*-values in bold are below 0.05.

| Mt Adams Snowfield                      | Light<br>T=60<br>min  | PO <sub>4</sub> <sup>3-</sup><br>T=60<br>min  | NO <sub>3</sub> <sup>-</sup><br>T=60<br>min  | NH <sub>4</sub> <sup>+</sup><br>T=60<br>min  | UVblock<br>T=60<br>min  | Dark<br>T=60<br>min  |
|-----------------------------------------|-----------------------|-----------------------------------------------|----------------------------------------------|----------------------------------------------|-------------------------|----------------------|
| Light T=60 min                          | -                     | 0.9969                                        | 0.9806                                       | 0.7039                                       | 0.9981                  | <b>0.0000</b>        |
| PO <sub>4</sub> <sup>3-</sup> T=60 min  |                       | -                                             | 0.5668                                       | 0.4138                                       | 0.8801                  | <b>0.0000</b>        |
| NO <sub>3</sub> <sup>-</sup> T=60 min   |                       |                                               | -                                            | 0.3374                                       | 0.5656                  | <b>0.0000</b>        |
| NH <sub>4</sub> <sup>+</sup> T=60 min   |                       |                                               |                                              | -                                            | 0.4455                  | <b>0.0000</b>        |
| UV block T=60 min                       |                       |                                               |                                              |                                              | -                       | <b>0.0000</b>        |
| Dark T=60 min                           |                       |                                               |                                              |                                              |                         | -                    |
| Mt Adams Snowfield                      | Light<br>T=300<br>min | PO <sub>4</sub> <sup>3-</sup><br>T=300<br>min | NO <sub>3</sub> <sup>-</sup><br>T=300<br>min | NH <sub>4</sub> <sup>+</sup><br>T=300<br>min | UVblock<br>T=300<br>min | Dark<br>T=300<br>min |
| Light T=300 min                         | -                     | 0.9953                                        | 0.9998                                       | 0.9980                                       | 0.3219                  | <b>0.0000</b>        |
| PO <sub>4</sub> <sup>3-</sup> T=300 min |                       | -                                             | 0.9905                                       | 1.0000                                       | 0.1561                  | <b>0.0000</b>        |
| NO <sub>3</sub> <sup>-</sup> T=300 min  |                       |                                               | -                                            | 0.9953                                       | 0.3590                  | <b>0.0000</b>        |
| NH <sub>4</sub> <sup>+</sup> T=300 min  |                       |                                               |                                              | -                                            | 0.1773                  | <b>0.0000</b>        |
| UV block T=300 min                      |                       |                                               |                                              |                                              | -                       | <b>0.0000</b>        |
| Dark T=300 min                          |                       |                                               |                                              |                                              |                         | -                    |

Table S4. *p*-values for t-tests for each comparison of <sup>13</sup>C uptake rates from the Eliot Glacier microcosms. *p*-values in bold are below 0.05.

| Eliot Glacier                 | Light | PO <sub>4</sub> <sup>3-</sup> | NO <sub>3</sub> <sup>-</sup> | NH <sub>4</sub> <sup>+</sup> | UV block      | Dark          |
|-------------------------------|-------|-------------------------------|------------------------------|------------------------------|---------------|---------------|
| Light                         | -     | 0.3013                        | 0.9755                       | <b>0.0003</b>                | <b>0.0098</b> | <b>0.0030</b> |
| PO <sub>4</sub> <sup>3-</sup> |       | -                             | 0.1015                       | <b>0.0000</b>                | <b>0.0003</b> | <b>0.0004</b> |
| NO <sub>3</sub> <sup>-</sup>  |       |                               | -                            | <b>0.0007</b>                | <b>0.0330</b> | <b>0.0006</b> |
| NH <sub>4</sub> <sup>+</sup>  |       |                               |                              | -                            | 0.2495        | <b>0.0000</b> |
| UV block                      |       |                               |                              |                              | -             | <b>0.0049</b> |
| Dark                          |       |                               |                              |                              |               | -             |



Table S6. Taxonomic classification and the number of sequences assigned to the 10 most abundant eukaryal OTUs. Sediment (Sed); supraglacial snow (Supra); snowfield samples (Snow).

| Eukarya   |                      |                    |                                                                        |                |      |                    |      |                 |     |               |     |                 |      |      |
|-----------|----------------------|--------------------|------------------------------------------------------------------------|----------------|------|--------------------|------|-----------------|-----|---------------|-----|-----------------|------|------|
|           |                      |                    |                                                                        | Palmer Glacier |      | Mt Adams Snowfield |      | Gotchen Glacier |     | Eliot Glacier |     | Collier Glacier |      |      |
| Abundance |                      |                    |                                                                        |                |      |                    |      |                 |     |               |     |                 |      |      |
| OTU       | Phylum <sup>a</sup>  | Genus <sup>a</sup> | Closest BlastN match (accession number, percent identity) <sup>b</sup> | Supra          | Sed  | Supra              | Sed  | Supra           | Sed | Supra         | Sed | Supra           | Sed  |      |
| 1         | Chlorophyceae        | Chlamydomonas      | Alpine snow (GU117574, 99%)                                            | 6151           | 294  | 566                | 421  | 1111            | 67  | 4162          | 113 | 2492            | 31   | 3313 |
| 2         | Chlorophyceae        | Chloromonas        | Swiss Alps seasonal snow pack (KT184442, 99%)                          | 4384           | 31   | 57                 | 57   | 4355            | 47  | 2001          | 486 | 2171            | 79   | 4111 |
| 3         | Chlorophyceae        | Chlamydomonas      | Alpine snow (GU117575, 99%)                                            | 411            | 3463 | 3470               | 16   | 2216            | 16  | 211           | 556 | 929             | 4354 | 741  |
| 4         | Chlorophyceae        | Chloromonas        | Mountain snow (EF408044, 100%)                                         | 55             | 664  | 4384               | 66   | 234             | 57  | 1355          | 12  | 486             | 211  | 569  |
| 5         | Chlorophyceae        | Chlamydomonas      | Red snow (AB902973, 98%)                                               | 417            | 2395 | 1389               | 45   | 389             | 251 | 194           | 11  | 1383            | 44   | 908  |
| 6         | Chlorophyceae        | Chlamydomonas      | Swiss Alps seasonal snow pack (KT184415, 97%)                          | 311            | 59   | 516                | 429  | 2444            | 41  | 338           | 9   | 1007            | 10   | 378  |
| 7         | Chlorophyceae        | Chlamydomonas      | Middle Fork Toklat Glacier (KM87066, 98%)                              | 265            | 11   | 476                | 0    | 2326            | 0   | 0             | 119 | 1431            | 112  | 762  |
| 8         | Agaricostilbomycetes | Bensingtonia       | Swiss Alps seasonal snow pack (KT184422, 99%)                          | 3              | 179  | 0                  | 1690 | 3               | 137 | 1451          | 5   | 217             | 696  | 864  |
| 9         | Agaricomycetes       | Mycocalia          | Paddy soil (KJ021750, 100%)                                            | 11             | 360  | 7                  | 675  | 33              | 439 | 1234          | 5   | 7               | 793  | 670  |
| 10        | Euglenida            | Euglena            | Copper mine tailings (KM016992, 99%)                                   | 12             | 918  | 19                 | 632  | 2               | 194 | 1173          | 11  | 49              | 504  | 39   |

<sup>a</sup> Phylum and Genus affiliation based on Silva classification.

<sup>b</sup> Environment where the most closely related sequence (based on BLASTN analyses) was recovered from.

Table S7. Taxonomic classification and the number of sequences assigned to the 10 most abundant bacterial OTUs. Sediment (Sed); supraglacial snow (Supra); snowfield samples (Snow).

|     |                     |                    |                                                                        | Bacteria       |      |                    |      |                 |      |               |      |                 |      |      |
|-----|---------------------|--------------------|------------------------------------------------------------------------|----------------|------|--------------------|------|-----------------|------|---------------|------|-----------------|------|------|
|     |                     |                    |                                                                        | Palmer Glacier |      | Mt Adams Snowfield |      | Gotchen Glacier |      | Eliot Glacier |      | Collier Glacier |      |      |
|     |                     |                    |                                                                        | Abundance      |      |                    |      |                 |      |               |      |                 |      |      |
| OTU | Phylum <sup>a</sup> | Genus <sup>a</sup> | Closest BlastN match (accession number, percent identity) <sup>b</sup> | Supra          | Sed  | Snow               | Sed  | Supra           | Sed  | Supra         | Sed  | Supra           | Sed  | Sed  |
| 1   | Bacteroidetes       | Solitalea          | Gulkana Glacier surface (AB464935, 99%)                                | 92             | 2057 | 2060               | 4549 | 15              | 3681 | 101           | 286  | 41              | 972  | 80   |
| 2   | Bacteroidetes       | Ferruginibacter    | Freshwater biofilm (KU221939, 99%)                                     | 96             | 820  | 1524               | 709  | 43              | 2270 | 136           | 2234 | 47              | 1090 | 1293 |
| 3   | Proteobacteria      | Polaromonas        | Drinking water treatment plant (KU13256, 100%)                         | 674            | 1080 | 1491               | 494  | 390             | 1456 | 542           | 1324 | 357             | 161  | 1617 |
| 4   | Bacteroidetes       | Hymenobacter       | Kuytun Glacier surface (EU263709, 100%)                                | 30             | 293  | 67                 | 26   | 39              | 205  | 110           | 1509 | 84              | 2633 | 366  |
| 5   | Proteobacteria      | Polaromonas        | Lake Taihu (KX365928, 100%)                                            | 460            | 338  | 1027               | 293  | 231             | 586  | 401           | 658  | 361             | 281  | 617  |
| 6   | Proteobacteria      | Acidocella         | Glacier ice worm-associated (AB98911, 100%)                            | 39             | 306  | 647                | 1029 | 18              | 1392 | 33            | 491  | 28              | 994  | 90   |
| 7   | Proteobacteria      | Novosphingobium    | Glacier ice worm-associated (AB991104, 100%)                           | 116            | 94   | 378                | 1489 | 30              | 464  | 66            | 86   | 31              | 195  | 89   |
| 8   | Actinobacteria      | Unclassified       | Glacier ice worm-associated (AB98967, 100%)                            | 88             | 231  | 331                | 281  | 60              | 253  | 40            | 395  | 111             | 207  | 168  |
| 9   | Proteobacteria      | Acidicaldus        | Peat soil (LK025473, 100%)                                             | 126            | 764  | 168                | 5    | 8               | 164  | 141           | 234  | 23              | 14   | 312  |
| 10  | Proteobacteria      | Polaromonas        | Lake Naheul Huapi (KM132951, 100%)                                     | 212            | 200  | 165                | 138  | 231             | 208  | 221           | 128  | 216             | 84   | 135  |

<sup>a</sup> Phylum and Genus affiliation based on Silva classification.

<sup>b</sup> Environment where the most closely related sequence (based on BLASTN analyses) was recovered from.

Table S8. Taxonomic classification and the number of sequences assigned to the 10 most abundant archaeal OTUs. Sediment (Sed); supraglacial snow (Supra); snowfield samples (Snow).

| Archaea |                     |                                         |                                                                                                 |                |     |                    |     |                 |     |               |     |                 |     |     |
|---------|---------------------|-----------------------------------------|-------------------------------------------------------------------------------------------------|----------------|-----|--------------------|-----|-----------------|-----|---------------|-----|-----------------|-----|-----|
| OTU     | Phylum <sup>a</sup> | Group/Class                             | Closest BlastN match<br>(environmental)<br>(accession number,<br>percent identity) <sup>b</sup> | Abundance      |     |                    |     |                 |     |               |     |                 |     |     |
|         |                     |                                         |                                                                                                 | Palmer Glacier |     | Mt Adams Snowfield |     | Gotchen Glacier |     | Eliot Glacier |     | Collier Glacier |     |     |
|         |                     |                                         |                                                                                                 | Supra          | Sed | Snow               | Sed | Supra           | Sed | Supra         | Sed | Supra           | Sed | Sed |
| 1       | Thaumarchaeota      | Soil Crenarchaeotic Group (SCG)         | Gas hydrate zone permafrost (KU297806, 100%)                                                    | 82             | 1   | 4                  | 132 | 3               | 1   | 2             | 19  | 1               | 2   | 3   |
| 2       | Thaumarchaeota      | South African Gold Mine Gp 1 (SAGMCG-1) | Lake Maggiore deep hypolimnion (KP866347, 100%)                                                 | 12             | 2   | 3                  | 0   | 0               | 0   | 86            | 20  | 0               | 3   | 6   |
| 3       | Euryarchaeota       | Thermoplasmata                          | Lake Taihu (JN617345, 100%)                                                                     | 11             | 3   | 5                  | 0   | 1               | 0   | 0             | 3   | 16              | 0   | 0   |
| 4       | Thaumarchaeota      | Soil Crenarchaeotic Group (SCG)         | Air filter (JQ249548, 100%)                                                                     | 18             | 1   | 2                  | 3   | 14              | 2   | 1             | 1   | 1               | 5   | 4   |
| 5       | Thaumarchaeota      | Soil Crenarchaeotic Group (SCG)         | Gas hydrate zone permafrost (KU297799, 99%)                                                     | 0              | 0   | 0                  | 7   | 0               | 0   | 0             | 0   | 1               | 0   | 0   |
| 6       | Euryarchaeota       | Thermoplasmata                          | Receding glacier forefield (HM065810, 100%)                                                     | 2              | 0   | 0                  | 0   | 0               | 0   | 3             | 1   | 1               | 0   | 0   |
| 7       | Euryarchaeota       | Thermoplasmata                          | Bioleaching system of Dexing copper (KT067921, 100%)                                            | 1              | 3   | 0                  | 2   | 0               | 1   | 0             | 1   | 4               | 0   | 1   |
| 8       | Euryarchaeota       | Thermoplasmata                          | Yellow brown soil (KP018525, 100%)                                                              | 3              | 0   | 1                  | 0   | 1               | 0   | 3             | 1   | 1               | 1   | 0   |
| 9       | Thaumarchaeota      | Marine Group I                          | Antarctic surface seawater (KF558563, 99%)                                                      | 1              | 0   | 1                  | 0   | 2               | 0   | 1             | 0   | 1               | 2   | 0   |
| 10      | Euryarchaeota       | Thermoplasmata                          | Freshwater sediment (GU257191, 99%)                                                             | 1              | 2   | 1                  | 0   | 3               | 0   | 0             | 0   | 1               | 0   | 0   |

<sup>a</sup> Phylum and Group/Class affiliation based on Silva classification.

<sup>b</sup> Environment where the most closely related sequence (based on BLASTN analyses) was recovered from.
